# Supplementary material for: Fe3O4@nano-cellulose/TiCl: a bio-based and magnetically recoverable nano-catalyst for the synthesis of pyrimido[2,1-b]benzothiazole derivatives
Source: Royal Society of Chemistry journal article supplement (doi:10.1039/c6ra13566h), 2016-01-01
Supplement: c6ra13566h1.pdf [file c6ra13566h1.pdf]

## Fe<sub>3</sub>O<sub>4</sub>@nano-cellulose/TiCl<sub>4</sub>: Bio-based and magnetically recoverable nano-catalyst for the synthesis of pyrimido[2,1-b]benzothiazole derivatives

Sara Azad, Bi Bi Fatameh Mirjalili \*

Department of Chemistry, College of Science, Yazd University, Yazd, 89195-741, I. R. Iran

**Ethyl-2-methyl-4-(phenyl)-4*H*-pyrimido[2,1-*b*][1,3]benzothiazole-3-carboxylate (table 4, IV<sub>a</sub>).**

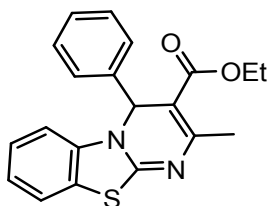

Pale yellow solid. <sup>1</sup>H NMR (Acetone-*d*<sub>6</sub>, 400 MHz): δ 7.70 (dd, *J*=8, 0.8 Hz, 1H), 7.52-7.54 (m, 2H), 7.40 (dd, *J*=8, 1.2 Hz, 1H), 7.30-7.35 (m, 3H), 7.19-7.26 (m, 2H), 6.54 (s, 1H), 4.07-4.20 (m, 2H), 2.38 (s, 3H), 1.27 (t, 3H, *J*=7.2 Hz). IR (KBr): 2974, 1669, 1594, 1460, 1242, 747 cm<sup>-1</sup>. mp: 178-180 °C.

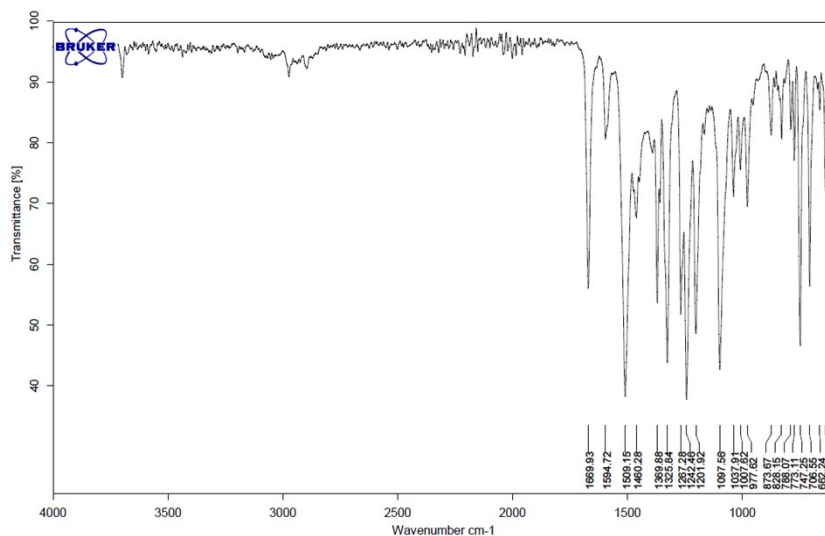

The FT-IR spectrum of product (IV<sub>a</sub>)

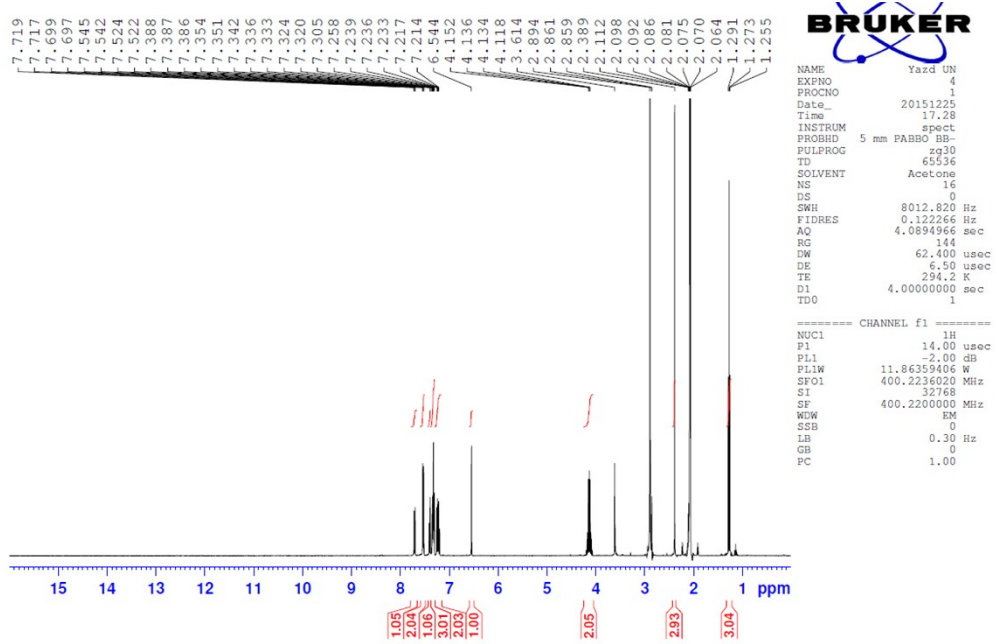

The  $^1\text{H}$  NMR (400MHz) spectrum of product (IV<sub>a</sub>)

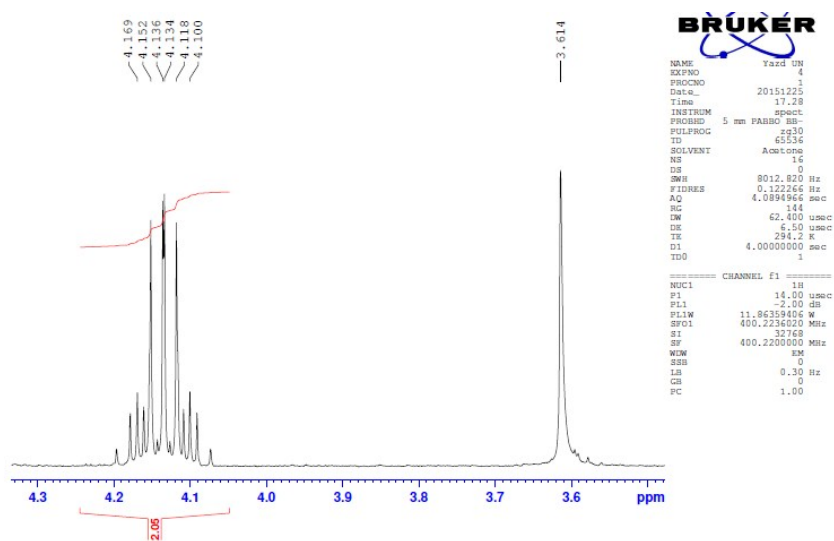

The  $^1\text{H}$  NMR (400MHz) spectrum of product (IV<sub>a</sub>)

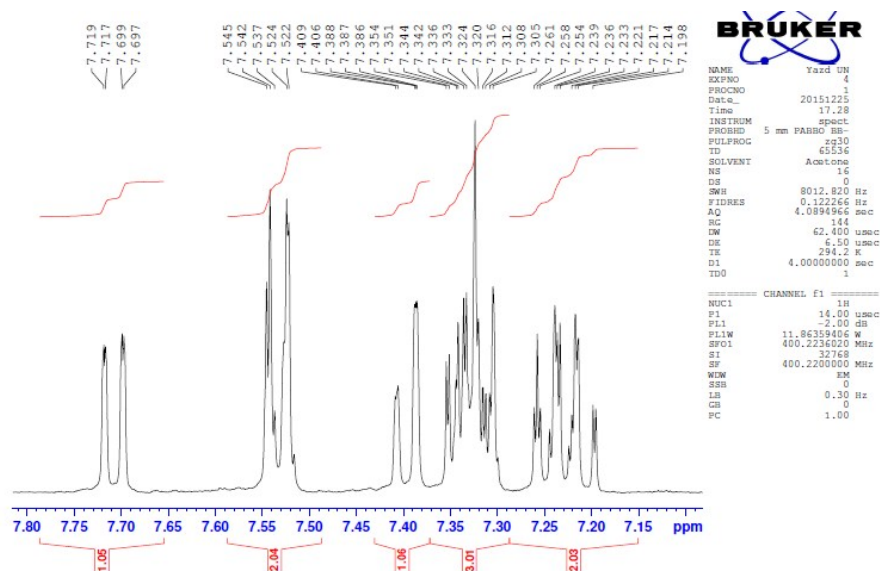

The  $^1\text{H}$  NMR (400MHz) spectrum of product (IV<sub>a</sub>)

**Ethyl-2-methyl-4-(4-nitrophenyl)-4*H*-pyrimido[2,1-*b*][1,3]benzothiazole-3-carboxylate**

(table 4, IV<sub>b</sub>).

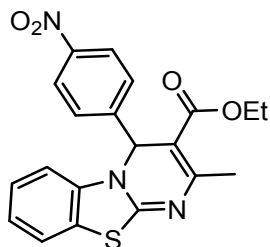

Yellow solid.  $^1\text{H}$  NMR (Acetone- $d_6$ , 400 MHz):  $\delta$  8.18 (d,  $J=8.8$  Hz, 2H), 7.80 (d,  $J=8$  Hz, 2H), 7.72 (d,  $J=8$  Hz, 1H), 7.41 (d,  $J=8$  Hz, 1H), 7.32 (t,  $J=8$  Hz, 1H), 7.22 (t,  $J=7.2$  Hz, 1H), 6.69 (s, 1H), 4.09-4.16 (m, 2H), 2.37 (s, 3H), 1.25 (t,  $J=7.2$  Hz, 3H). IR (KBr): 3074, 2981, 1700, 1670, 1585, 1501, 1347, 1272, 1242, 1202, 745  $\text{cm}^{-1}$ . mp: 171-173  $^\circ\text{C}$ .

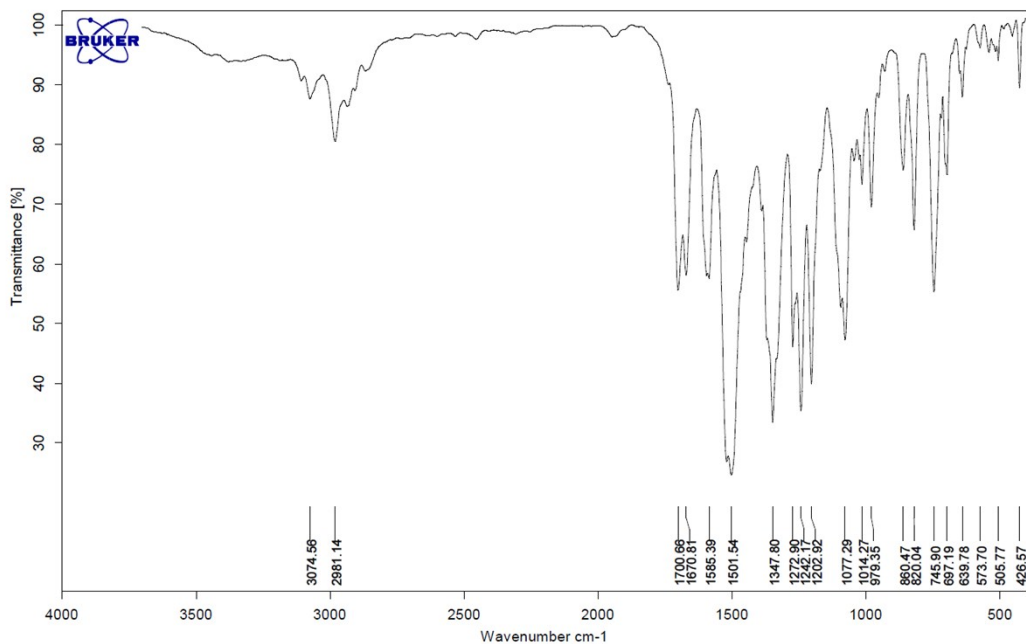

The FT-IR spectrum of product (IV<sub>b</sub>)

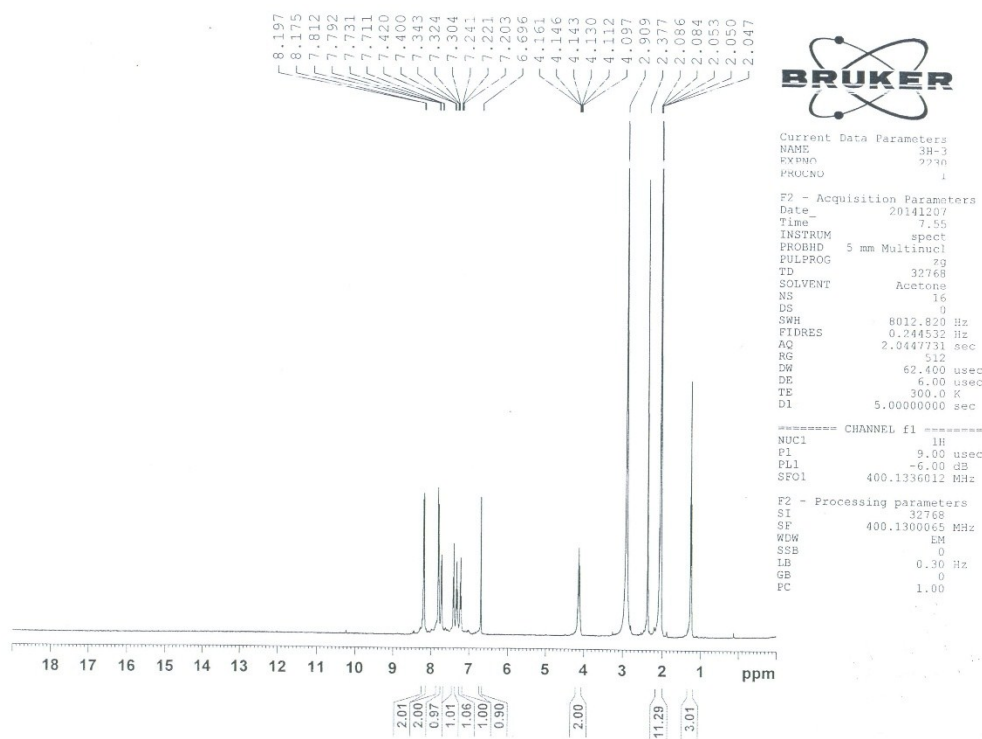

The <sup>1</sup>H NMR (400MHz) spectrum of product (IV<sub>b</sub>)

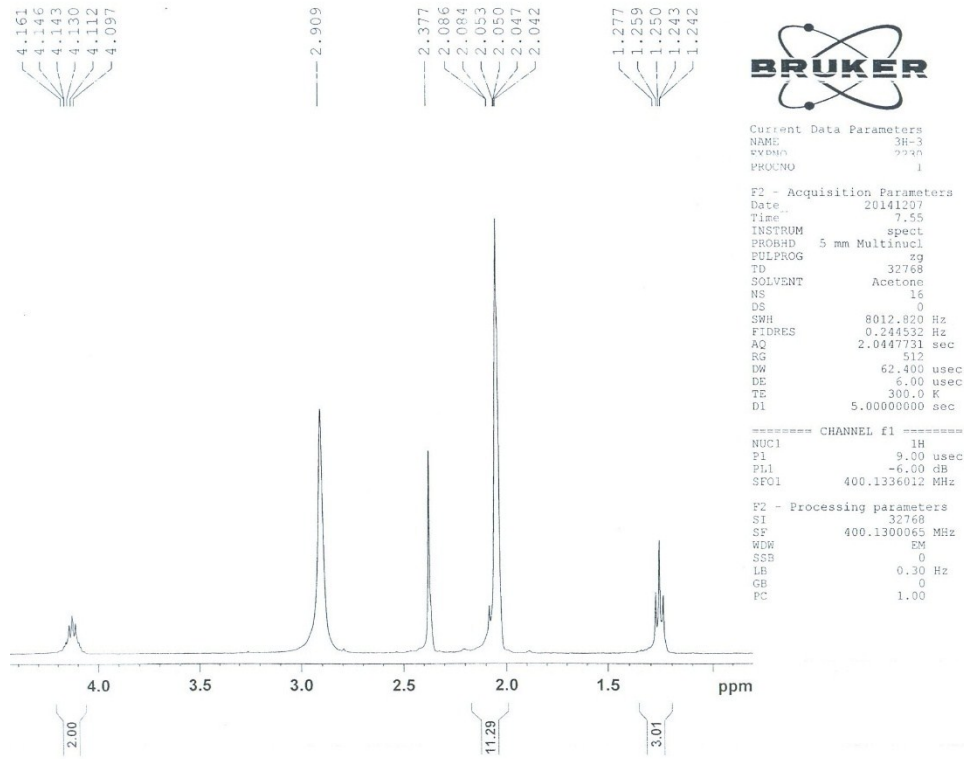

The <sup>1</sup>H NMR (400MHz) spectrum of product (IV<sub>b</sub>)

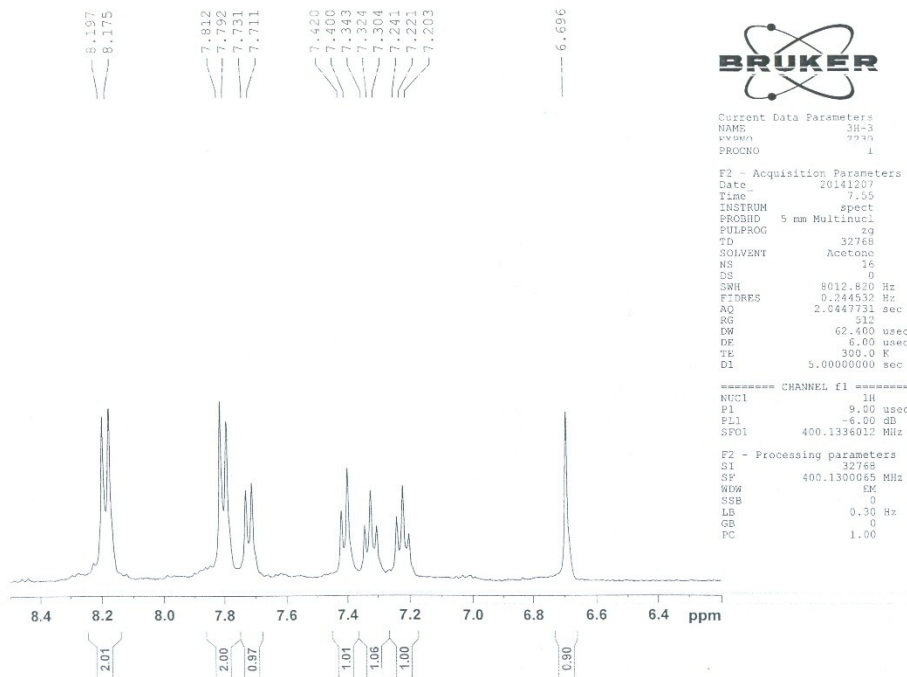

The <sup>1</sup>H NMR (400MHz) spectrum of product (IV<sub>b</sub>)

## Ethyl-2-methyl-4-(4-chlorophenyl)-4*H*-pyrimido[2,1-*b*][1,3]benzothiazole-3-carboxylate

(table 4, IV<sub>c</sub>).

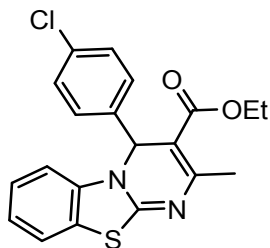

Yellow solid. <sup>1</sup>H NMR (Acetone-d<sub>6</sub>, 400 MHz): δ 7.70 (d, *J*=8 Hz, 1H), 7.50-7.55 (m, 2H), 7.30-7.41 (m, 4H), 7.21 (td, *J*=7.2, 1.2 Hz, 1H), 6.54 (s, 1H), 4.05-4.12 (m, 2H), 2.36 (s, 3H), 1.20-1.30 (m, 3H). IR (KBr): 2978, 1687, 1580, 1488, 1239, 1200, 1074, 833, 743 cm<sup>-1</sup>. mp: 87-89 °C.

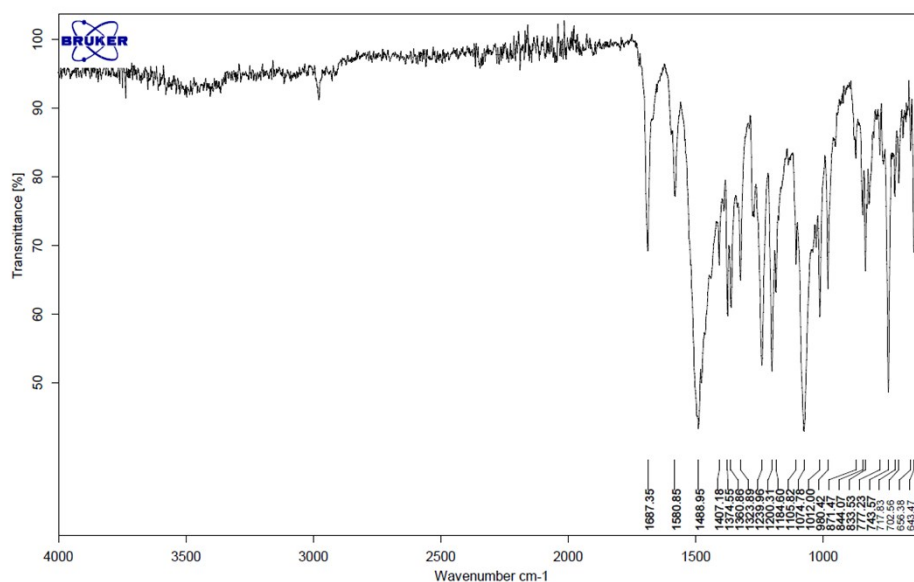

The FT-IR spectrum of product (IV<sub>c</sub>)

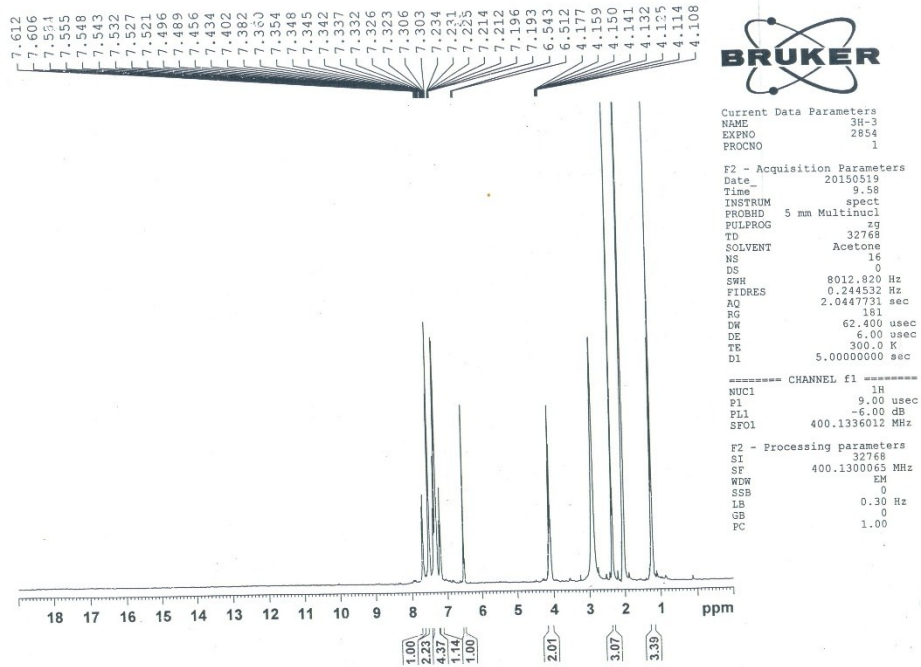

The  $^1\text{H}$  NMR (400MHz) spectrum of product (IV<sub>c</sub>)

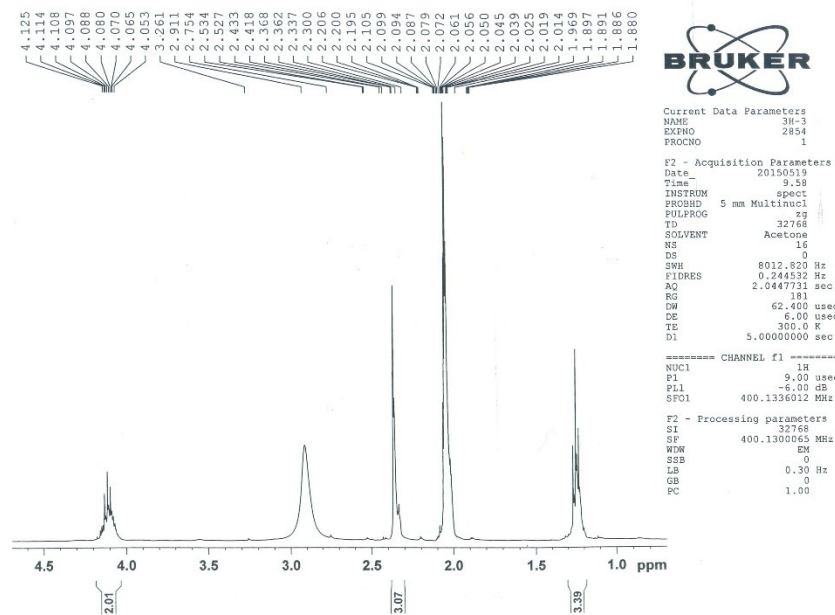

The  $^1\text{H}$  NMR (400MHz) spectrum of product (IV<sub>c</sub>)

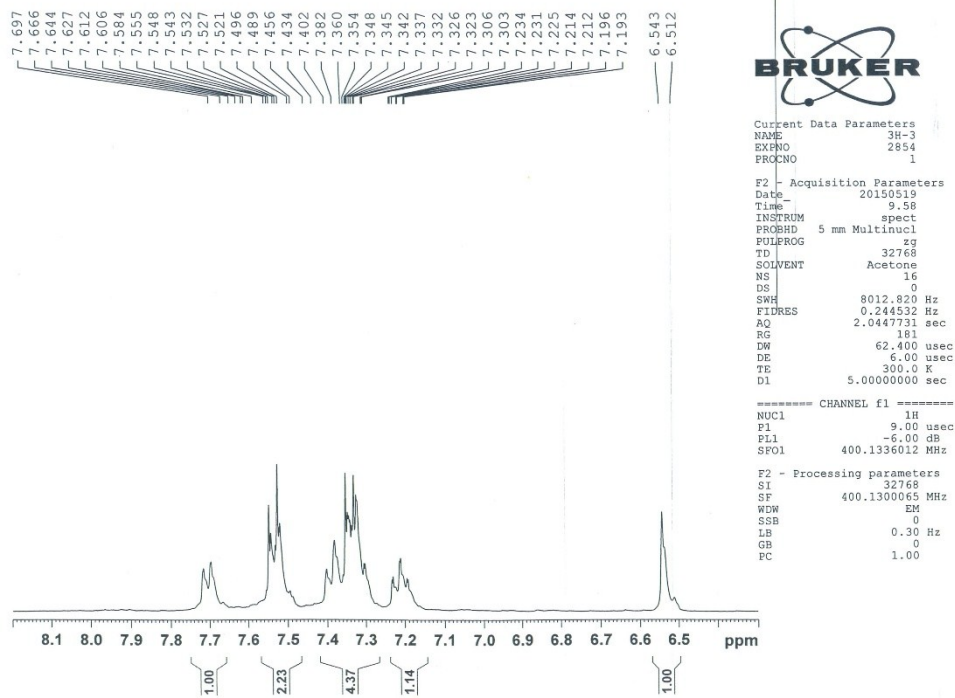

The  $^1\text{H}$  NMR (400MHz) spectrum of product (IV<sub>c</sub>)

**Ethyl-2-methyl-4-(4-bromo phenyl)-4H-pyrimido[2,1-b][1,3]benzothiazole-3-carboxylate**  
 (table 4, IV<sub>d</sub>).

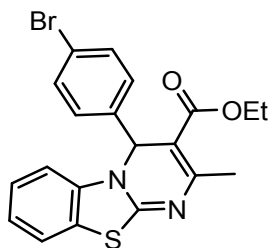

Orange solid.  $^1\text{H}$  NMR (Acetone- $d_6$ , 400 MHz):  $\delta$  7.70 (d,  $J=8$  Hz, 1H), 7.43-7.51 (m, 4H), 7.38 (d,  $J=8$  Hz, 1H), 7.32 (td,  $J=8, 1.2$ , Hz, 1H), 7.20 (td,  $J=8, 1.2$ , Hz, 1H), 6.52 (s, 1H), 4.07-4.15 (m, 2H), 2.37 (s, 3H), 1.20 (t, 3H). IR (KBr): 1693, 1582, 1482, 1406, 1270, 1239, 1201, 1069, 873, 743  $\text{cm}^{-1}$ . mp: 110-114  $^\circ\text{C}$ .



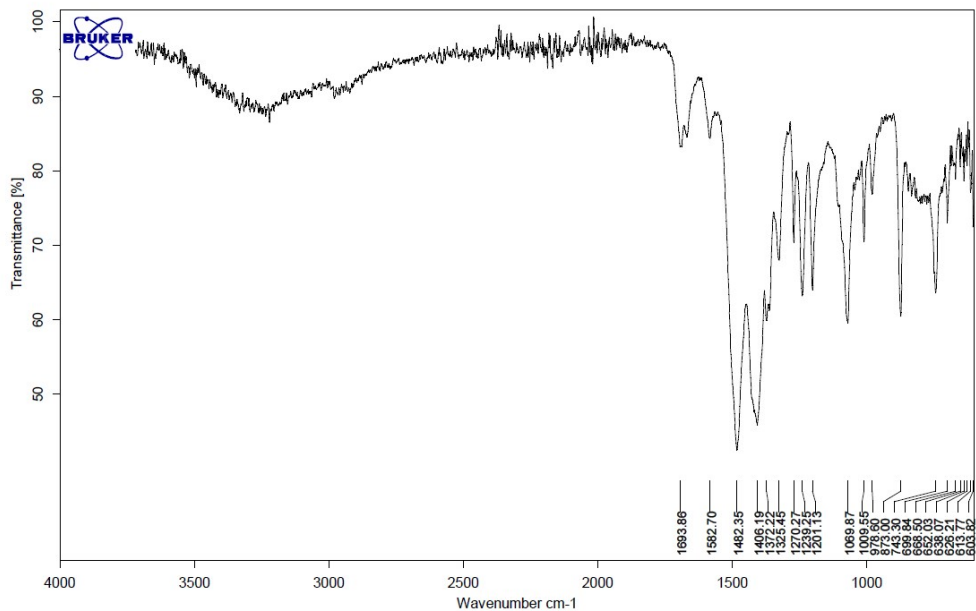

The FT-IR spectrum of product (IV<sub>d</sub>)

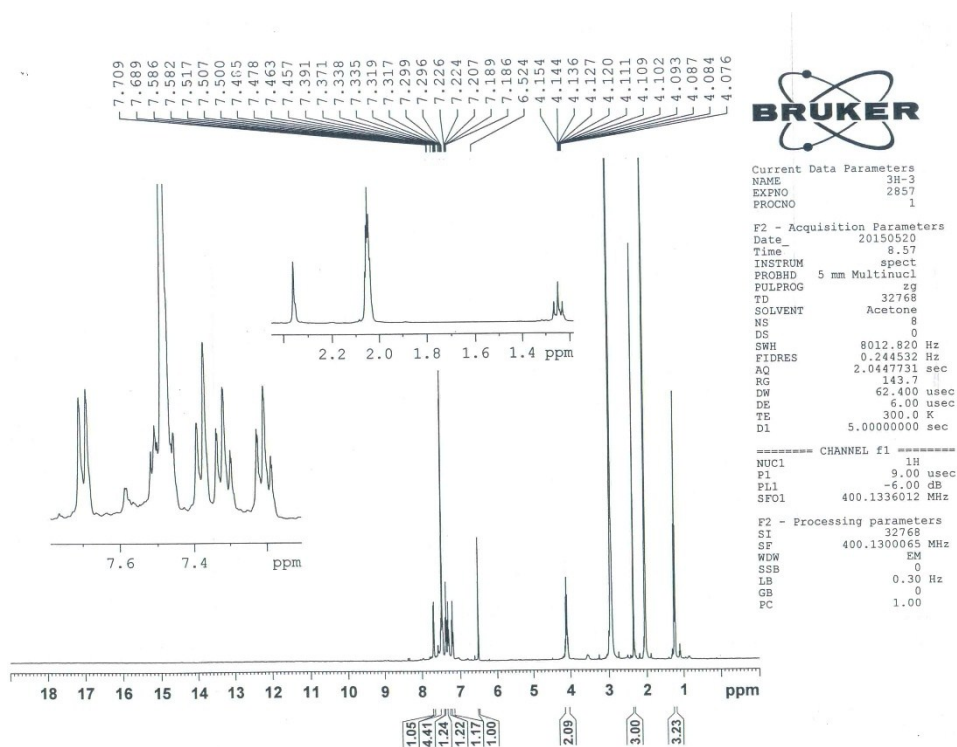

The <sup>1</sup>H NMR (400MHz) spectrum of product (IV<sub>d</sub>)

**Ethyl-2-methyl-4-(4-hydroxy phenyl)-4*H*-pyrimido[2,1-*b*][1,3]benzothiazole-3-carboxylate**  
(table 4, IV<sub>e</sub>).

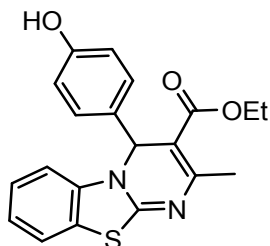

Pale yellow solid. <sup>1</sup>H NMR (Acetone-d<sub>6</sub>, 400 MHz): δ 8.10-8.20 (m, 1H), 7.80-7.91 (m, 1H), 7.40-7.60 (m, 5H), 6.80-6.90 (m, 2H), 6.78 (s, 1H), 4.10-4.40 (m, 2H), 2.60 (s, 3H), 1.30 (m, 3H). IR (KBr): 3402, 2887, 1718, 1611, 1540, 1514, 1465, 1343, 1277, 1242, 1113, 963, 843 cm<sup>-1</sup>. mp: 210-212 °C.

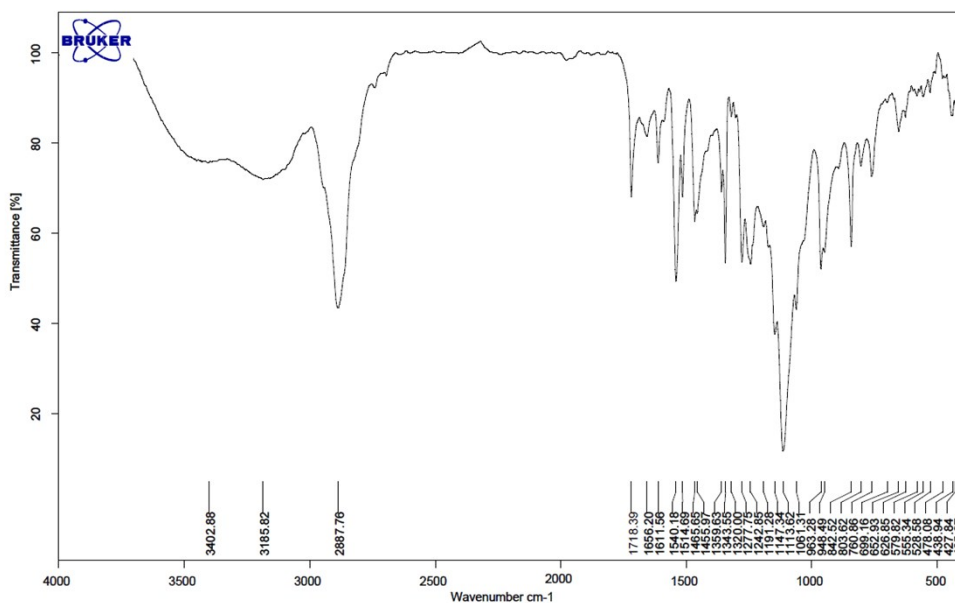

The FT-IR spectrum of product (IV<sub>e</sub>)

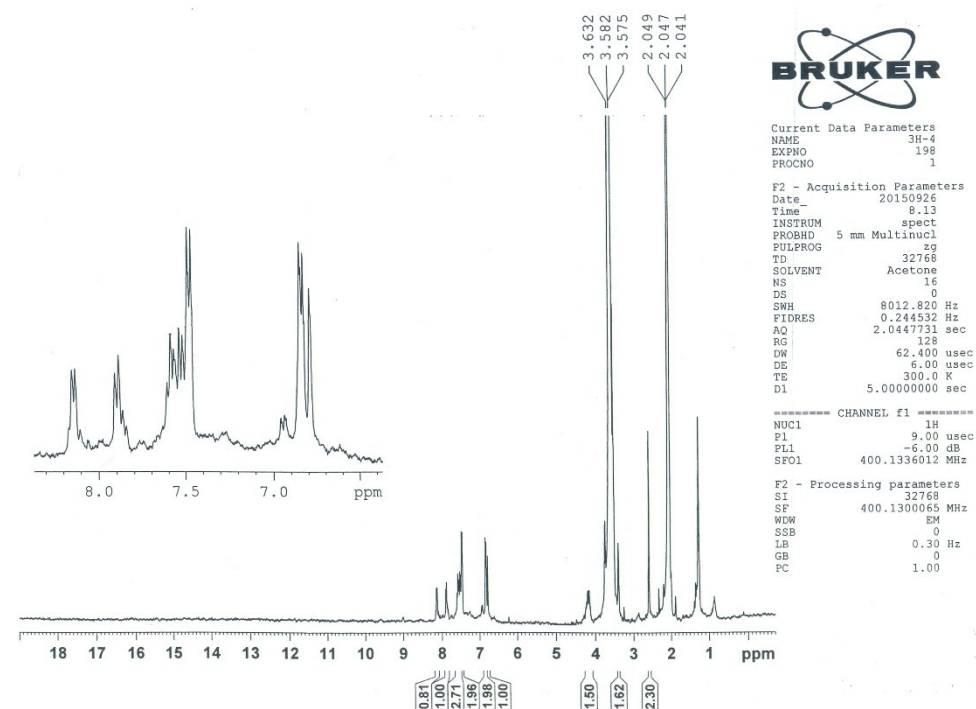

The  $^1\text{H}$  NMR (400MHz) spectrum of product (IV<sub>e</sub>)

**Ethyl-2-methyl-4-(2-nitrophenyl)-4*H*-pyrimido[2,1-*b*][1,3]benzothiazole-3-carboxylate**

(table 4, IV<sub>f</sub>).

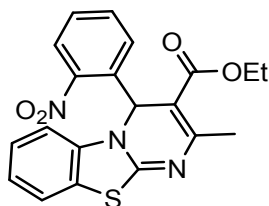

Red orange solid.  $^1\text{H}$  NMR (Acetone- $d_6$ , 400 MHz):  $\delta$  7.70 (m, 2H), 7.49 (d,  $J=8$  Hz, 1H), 7.30-7.38 (m, 3H), 7.27 (td,  $J=6.4, 1.2$  Hz, 1H), 7.22 (t,  $J=7.6$  Hz, 1H), 6.82 (s, 1H), 4.11 (q,  $J=7.2$  Hz, 2H), 2.37 (s, 3H), 1.20 (t,  $J=7.2$  Hz, 3H). IR (KBr): 2981, 1667, 1585, 1504, 1443, 1361, 1329, 1241, 1201, 1097, 743  $\text{cm}^{-1}$ . mp: 122-125  $^{\circ}\text{C}$ .

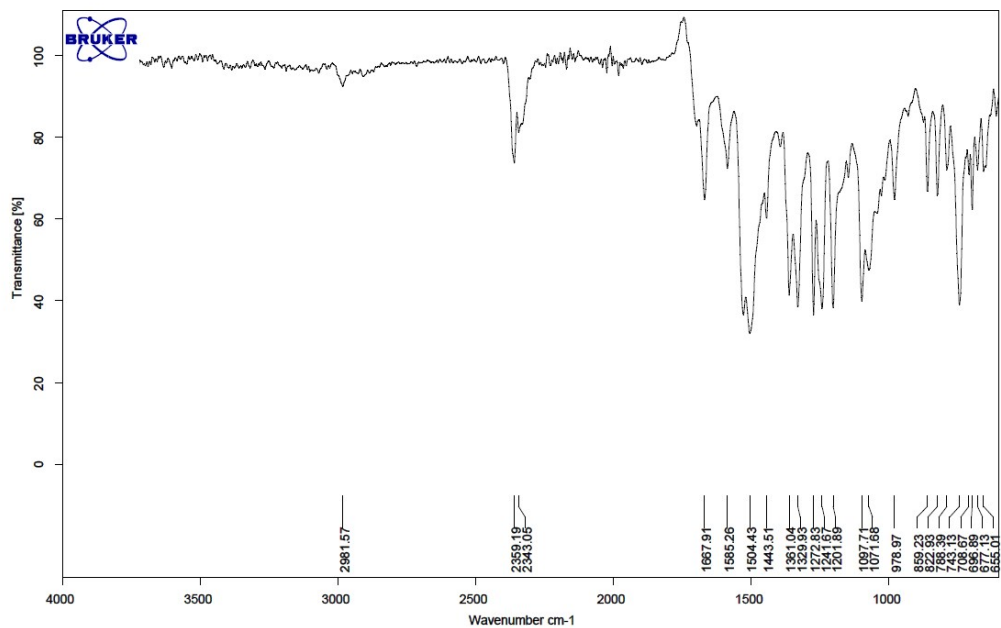

The FT-IR spectrum of product (IV<sub>f</sub>)

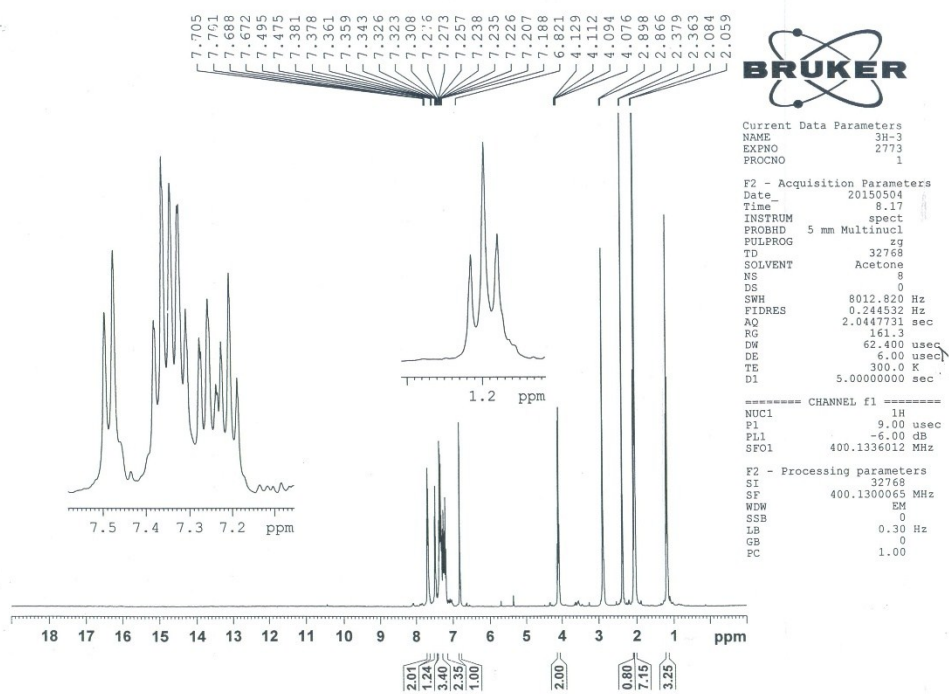

The <sup>1</sup>H NMR (400MHz) spectrum of product (IV<sub>f</sub>)

# Ethyl-2-methyl-4-(2-chlorophenyl)-4*H*-pyrimido[2,1-*b*][1,3]benzothiazole-3-carboxylate

(table 4, IV<sub>g</sub>).

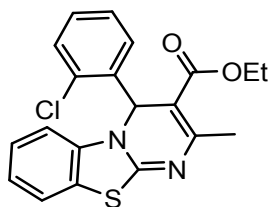

Yellow solid. <sup>1</sup>H NMR (Acetone-d<sub>6</sub>, 400 MHz): δ 7.94 (d, J=8 Hz, 1H), 7.84 (d, J=8 Hz, 1H), 7.74 (d, J=8 Hz, 1H), 7.67 (m, 1H), 7.49-7.54 (m, 2H), 7.38 (t, J=7.2 Hz, 1H), 7.25-7.31 (m, 2H), 3.97-3.99 (m, 1H), 4.01-4.15 (m, 1H), 2.30 (s, 1H), 1.2 (t, 3H). IR (KBr): 2969, 1675, 1593, 1473, 1367, 1325, 1268, 1237, 1096, 746 cm<sup>-1</sup>. mp: 124-126 °C.

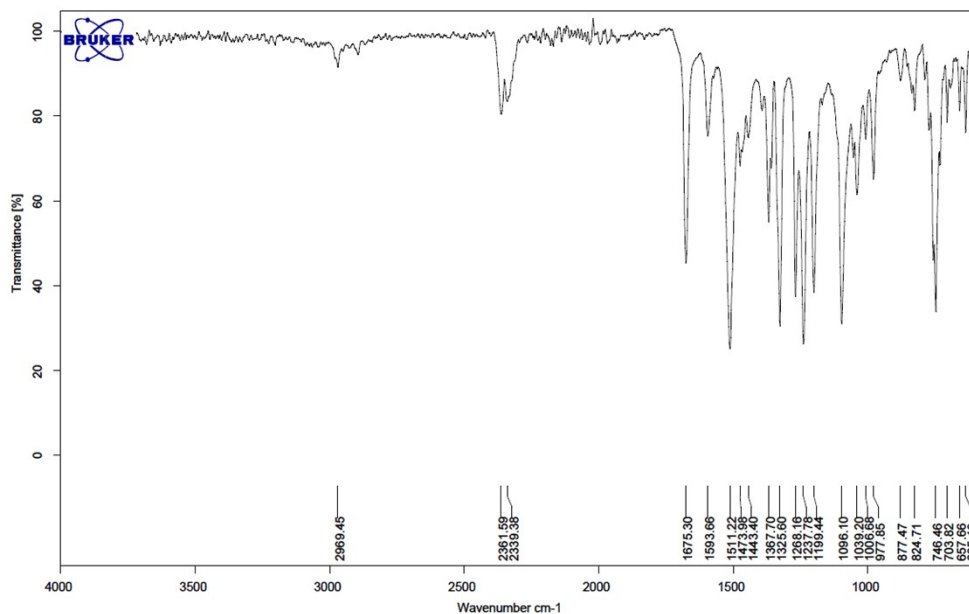

The FT-IR spectrum of product (IV<sub>g</sub>)

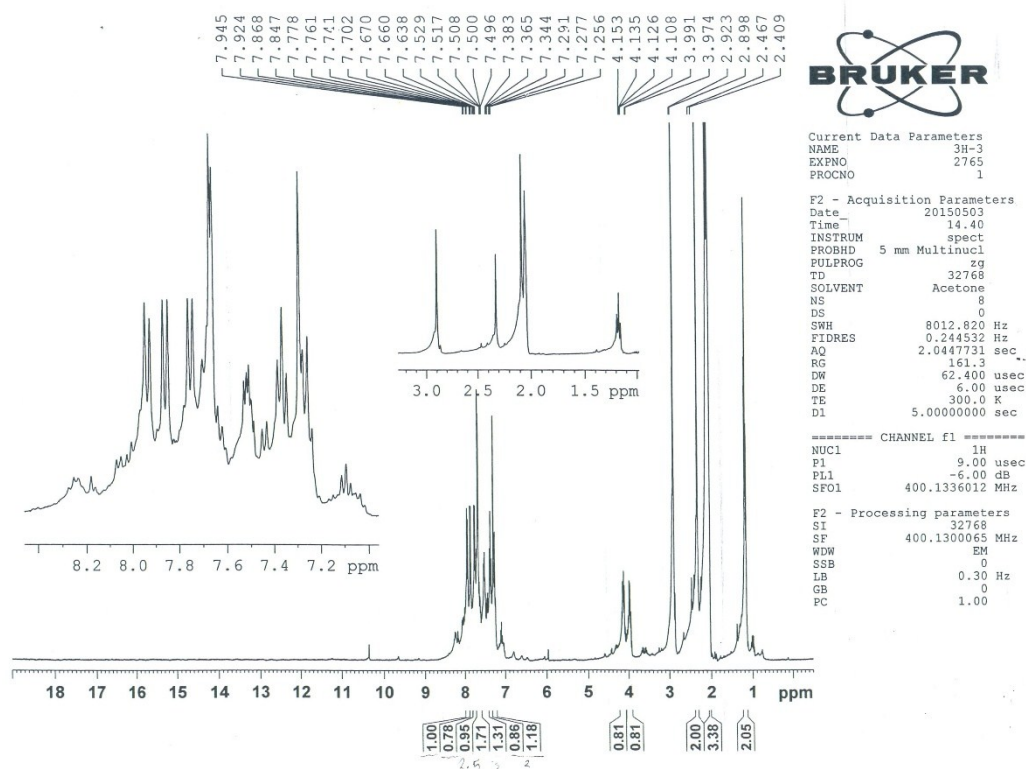

The  $^1\text{H}$  NMR (400MHz) spectrum of product (IV<sub>g</sub>)

**Ethyl-2-methyl-4-(2-ethoxy phenyl)-4*H*-pyrimido[2,1-*b*][1,3]benzothiazole-3-carboxylate**  
 (table 4, IV<sub>h</sub>).

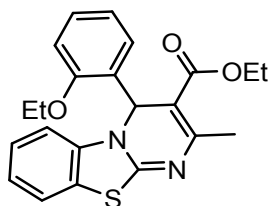

Yellow solid.  $^1\text{H}$  NMR (Acetone- $d_6$ , 400 MHz):  $\delta$  7.63 (d,  $J=8$  Hz, 1H), 7.53 (dd,  $J=7.6$ , 1.6 Hz, 1H), 7.47 (d,  $J=8$  Hz, 1H), 7.29 (m, 1H), 7.15-7.18 (m, 2H), 6.88-6.92 (m, 2H), 6.75 (s, 1H), 4.10-4.14 (m, 2H), 4.03 (q,  $J=7.2$  Hz, 2H), 2.37 (s, 3H), 1.50-1.54 (m, 3H), 1.16-1.20 (m, 3H). IR (KBr): 2980, 1692, 1600, 1511, 1493, 1242, 1201, 1075, 1040, 752  $\text{cm}^{-1}$ . mp: 171-175  $^{\circ}\text{C}$ .

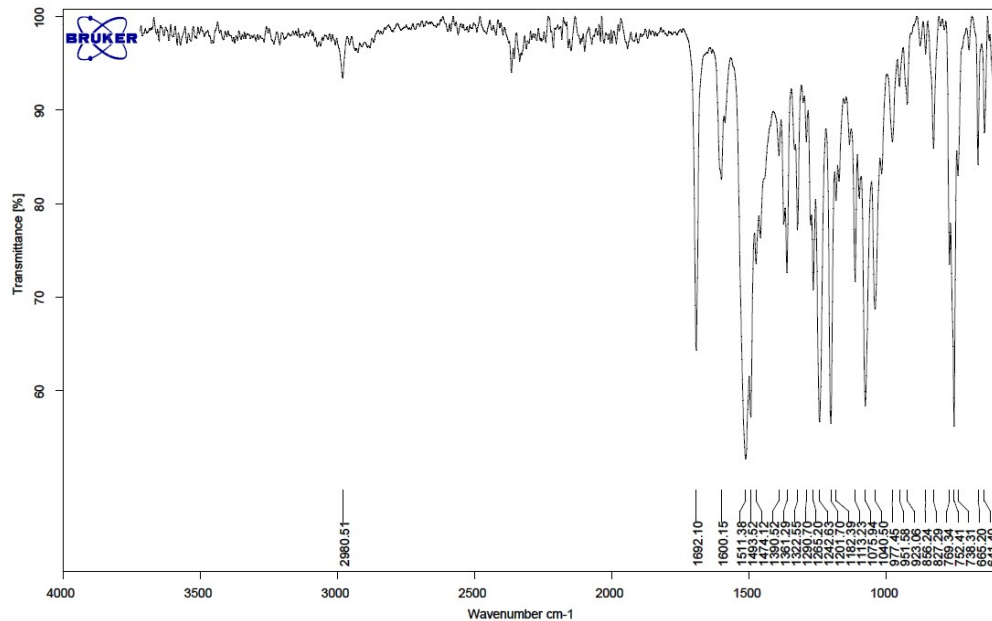

The FT-IR spectrum of product (IV<sub>h</sub>)

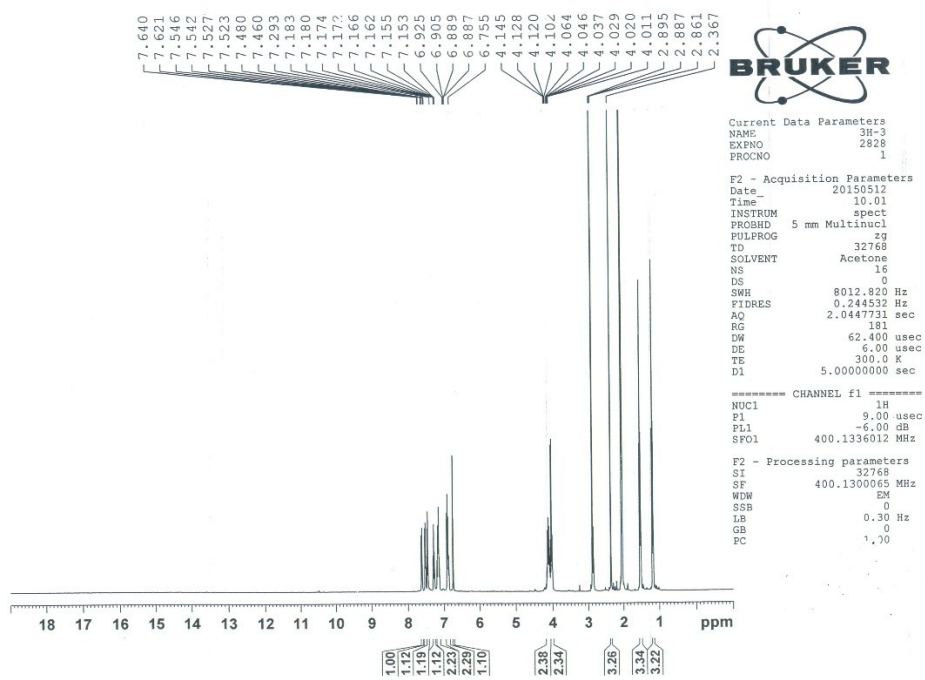

The <sup>1</sup>H NMR (400MHz) spectrum of product (IV<sub>h</sub>)

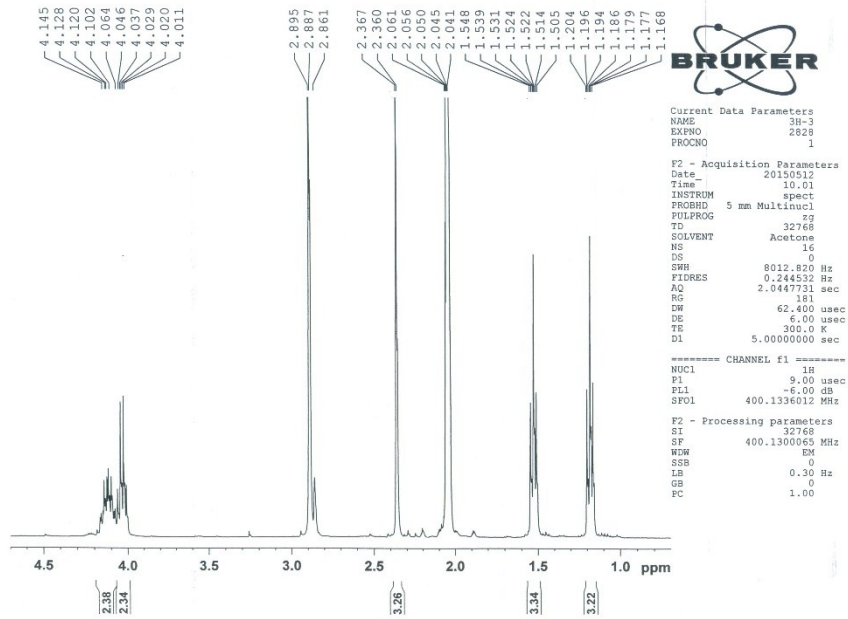

The  $^1\text{H}$  NMR (400MHz) spectrum of product ( $\text{IV}_h$ )

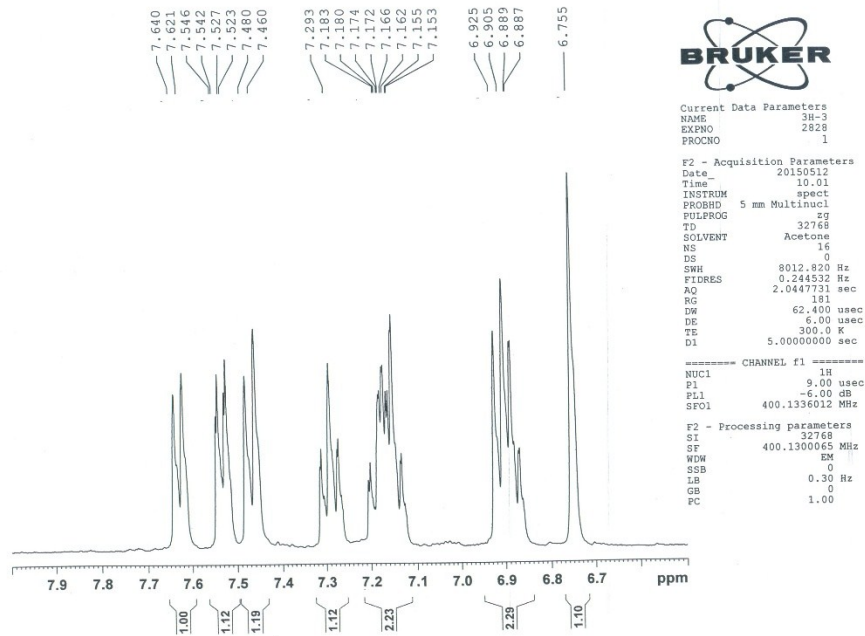

The  $^1\text{H}$  NMR (400MHz) spectrum of product ( $\text{IV}_h$ )



## Ethyl-2-methyl-4-(3-nitrophenyl)-4*H*-pyrimido[2,1-*b*][1,3]benzothiazole-3-carboxylate

(table 4, IV<sub>i</sub>).

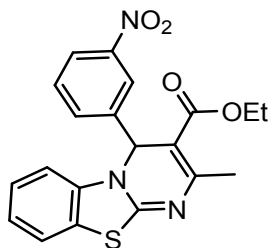

Light yellow solid. <sup>1</sup>H NMR (Acetone-*d*<sub>6</sub>, 400 MHz): δ 8.45 (s, 1H), 8.13 (d, *J*=8 Hz, 1H), 7.91 (d, *J*=8 Hz, 1H), 7.71 (d, *J*=8 Hz, 1H), 7.65 (t, *J*=8 Hz, 1H), 7.47 (d, *J*=8 Hz, 1H), 7.33 (t, *J*=8 Hz, 1H), 7.25 (t, *J*=8 Hz, 1H), 6.74 (s, 1H), 3.90-4.20 (m, 2H), 2.30 (s, 3H), 1.30 (m, 3H). IR (KBr): 1654, 1581, 1500, 1343, 1273, 1247, 1205, 1098, 748 cm<sup>-1</sup>. mp: 222-224 °C.

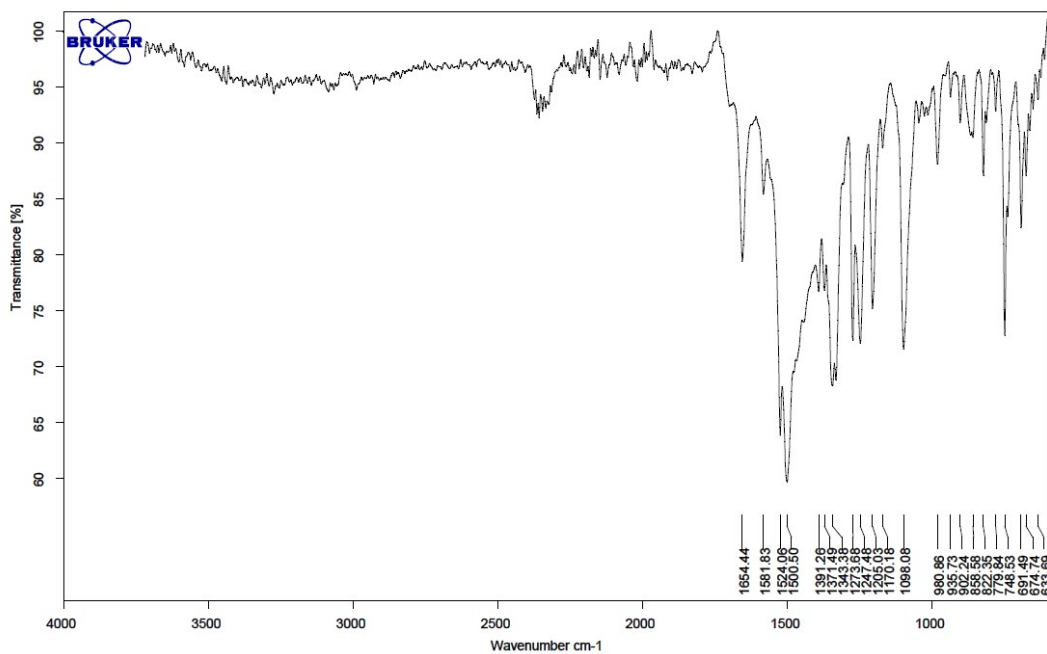

The FT-IR spectrum of product (IV<sub>i</sub>)

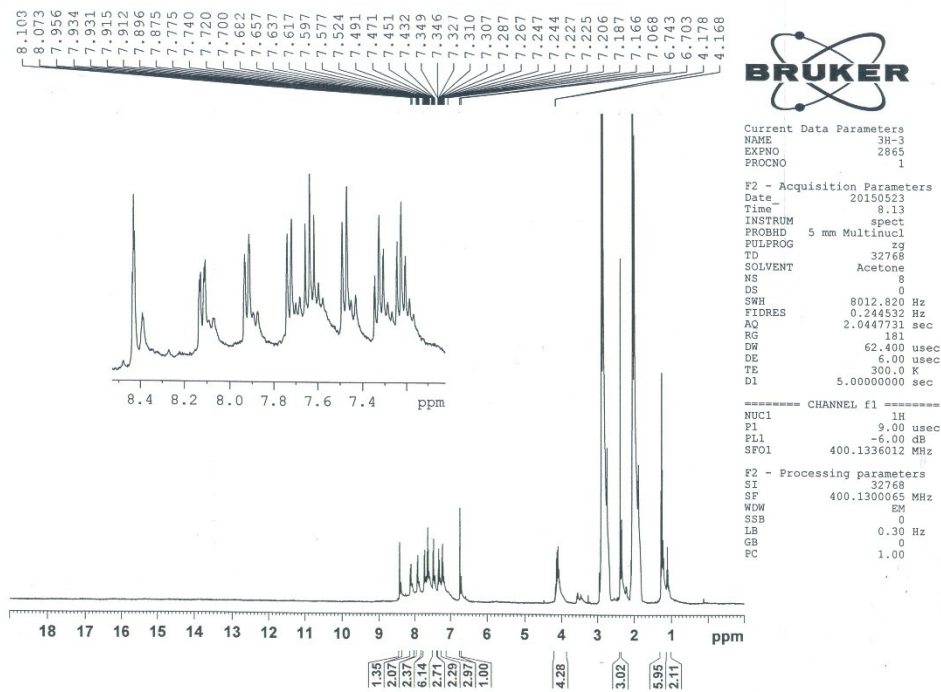

The  $^1\text{H}$  NMR (400MHz) spectrum of product (IV<sub>j</sub>)

**Ethyl-2-methyl-4-(3-hydroxy phenyl)-4H-pyrimido[2,1-b][1,3]benzothiazole-3-carboxylate**  
 (table 4, IV<sub>j</sub>).

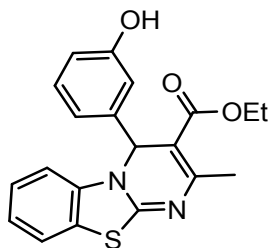

Yellow solid.  $^1\text{H}$  NMR (Acetone- $d_6$ , 400 MHz):  $\delta$  8.50 (s, 1H), 7.70 (m, 1H), 7.35 (m, 2H), 7.20 (m, 1H), 7.10 (m, 1H), 6.94 (m, 2H), 6.7 (m, 1H), 6.45 (s, 1H), 4.10 (q,  $J=7$  Hz, 2H), 2.33 (s, 3H), 1.27 (t,  $J=7$  Hz, 3H). IR (KBr): 3227, 3063, 2980, 2925, 1687, 1600, 1511, 1458, 1275, 1243, 1213, 1100, 788  $\text{cm}^{-1}$ . mp: 260-263  $^{\circ}\text{C}$ .

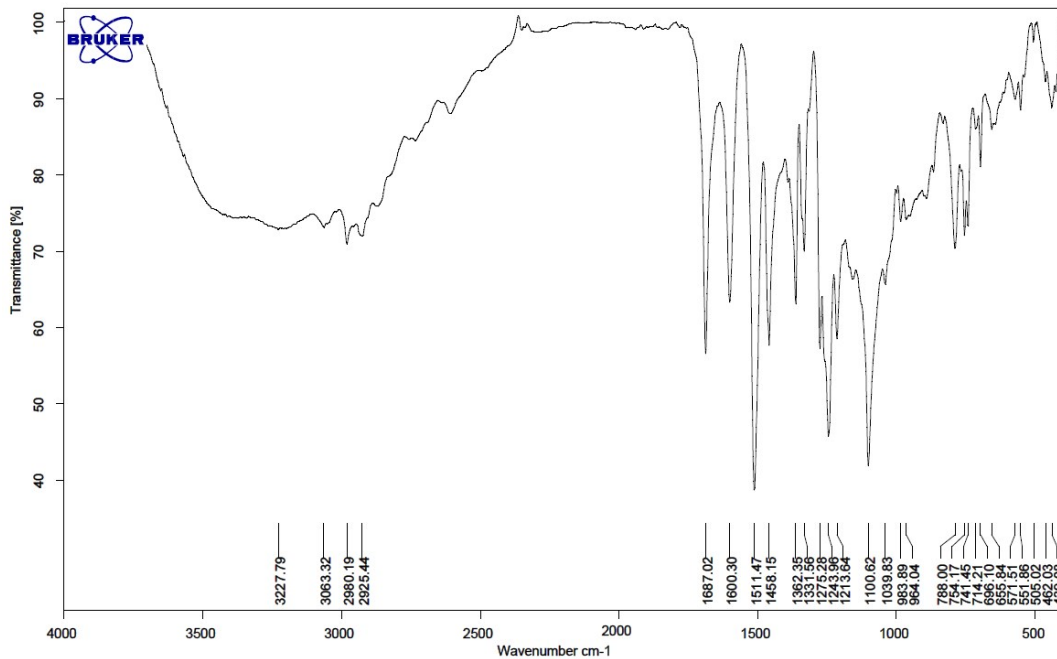

The FT-IR spectrum of product (IV<sub>j</sub>)

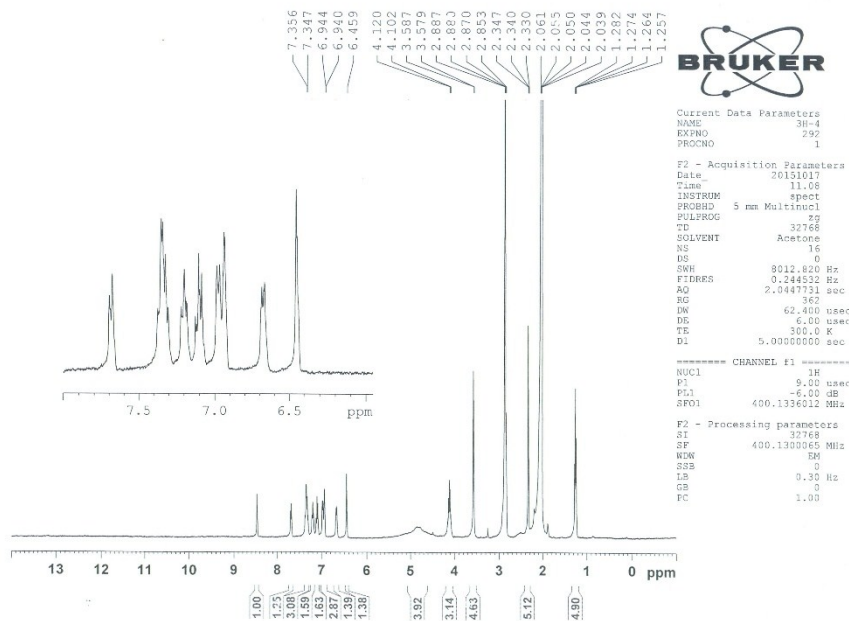

The <sup>1</sup>H NMR (400MHz) spectrum of product (IV<sub>j</sub>)

**Ethyl-2-methyl-4-(2,4-dichlorophenyl)-4*H*-pyrimido[2,1-*b*][1,3]benzothiazole-3-carboxylate**

**(table 4, IV<sub>k</sub>).**

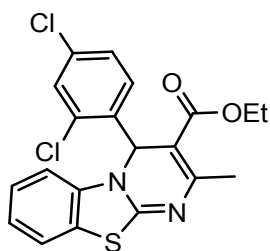

Yellow solid. <sup>1</sup>H NMR (Acetone-*d*<sub>6</sub>, 400 MHz): δ 7.69-7.72 (m, 2H), 7.33-7.46 (m, 4H), 7.22 (t, *J*=7.6 Hz, 1H), 6.82 (s, 1H), 4.11 (q, *J*=6.8 Hz, 2H), 2.37 (s, 3H), 1.20 (t, *J*=6.8 Hz, 3H). IR (KBr): 3007, 2971, 1698, 1583, 1490, 1360, 1242, 1201, 1076, 845, 743 cm<sup>-1</sup>. mp: 133-135 °C.

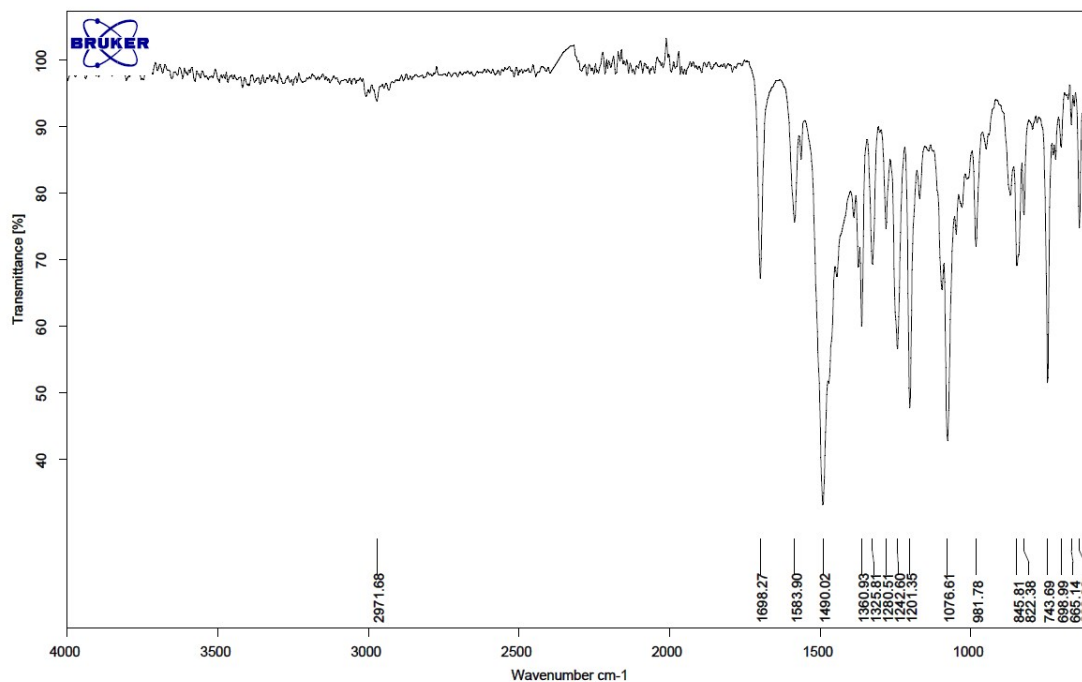

The FT-IR spectrum of product (IV<sub>k</sub>)

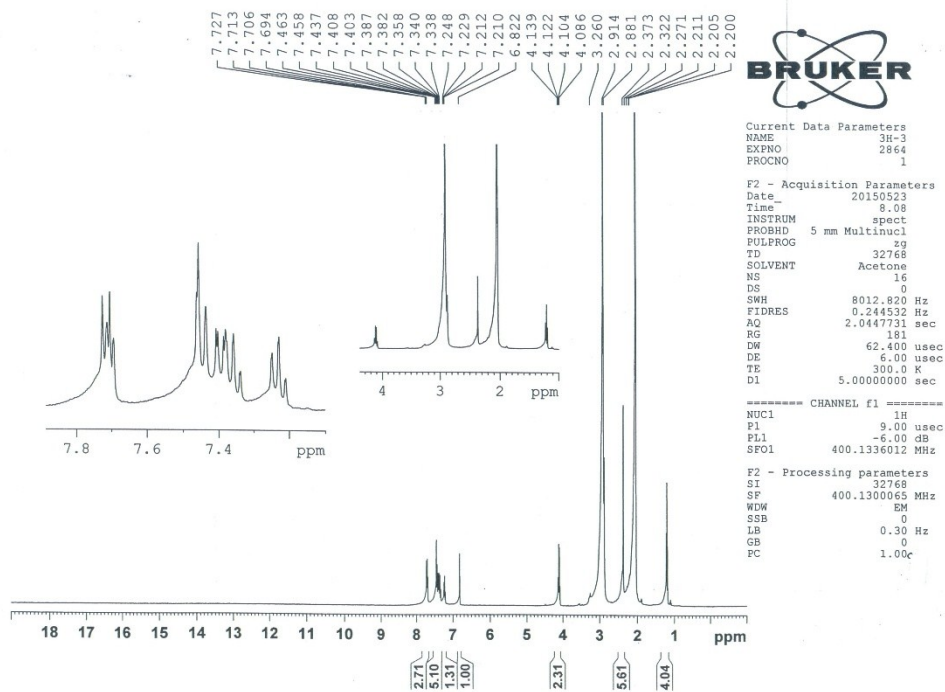

The  $^1\text{H}$  NMR (400MHz) spectrum of product (IV<sub>k</sub>)

**Ethyl-2-methyl-4-(2,4-dimethoxyphenyl)-4*H*-pyrimido[2,1-*b*][1,3]benzothiazole-3-carboxylate (table 4, IV<sub>l</sub>).**

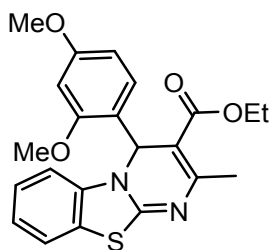

Yellow solid.  $^1\text{H}$  NMR (Acetone- $d_6$ , 400 MHz):  $\delta$  7.62 (d,  $J=7.6$  Hz, 1H), 7.45 (d,  $J=8$  Hz, 1H), 7.37 (d,  $J=8.4$  Hz, 1H), 7.30 (td,  $J=8, 1.2$  Hz, 1H), 7.15 (td,  $J=7.6, 1.2$  Hz, 1H), 6.68 (s, 1H), 6.44-6.48 (m, 2H), 4.05 (q,  $J=6.8$  Hz, 2H), 3.93 (s, 3H), 3.71 (s, 3H), 2.36 (s, 3H), 1.19 (t,  $J=6.8$  Hz, 3H). IR (KBr): 1694, 1583, 1497, 1271, 1239, 1203, 1075, 836, 739  $\text{cm}^{-1}$ . mp: 164-166  $^{\circ}\text{C}$ .

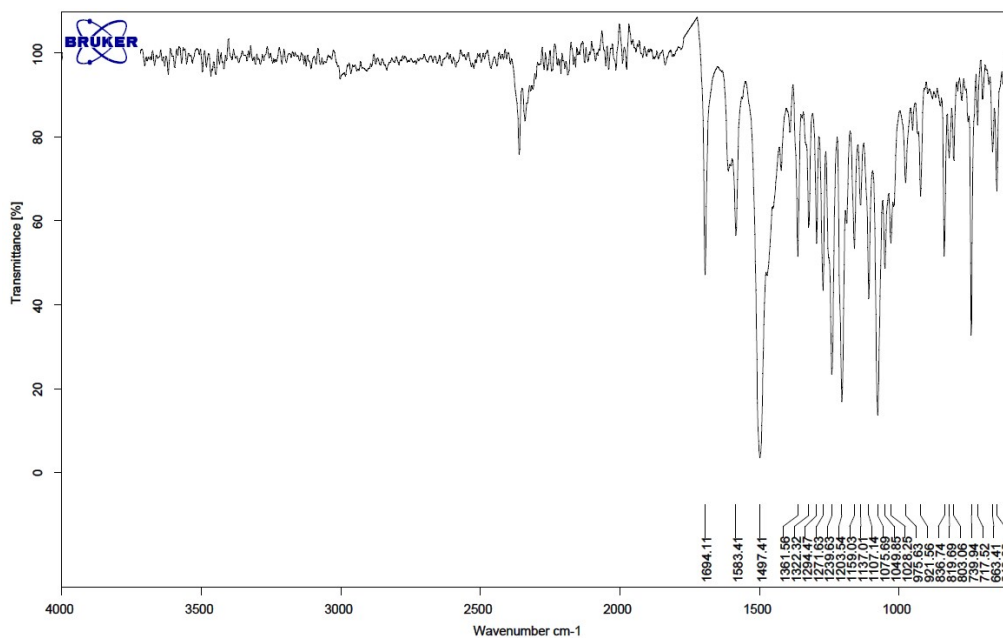

The FT-IR spectrum of product (IV<sub>1</sub>)

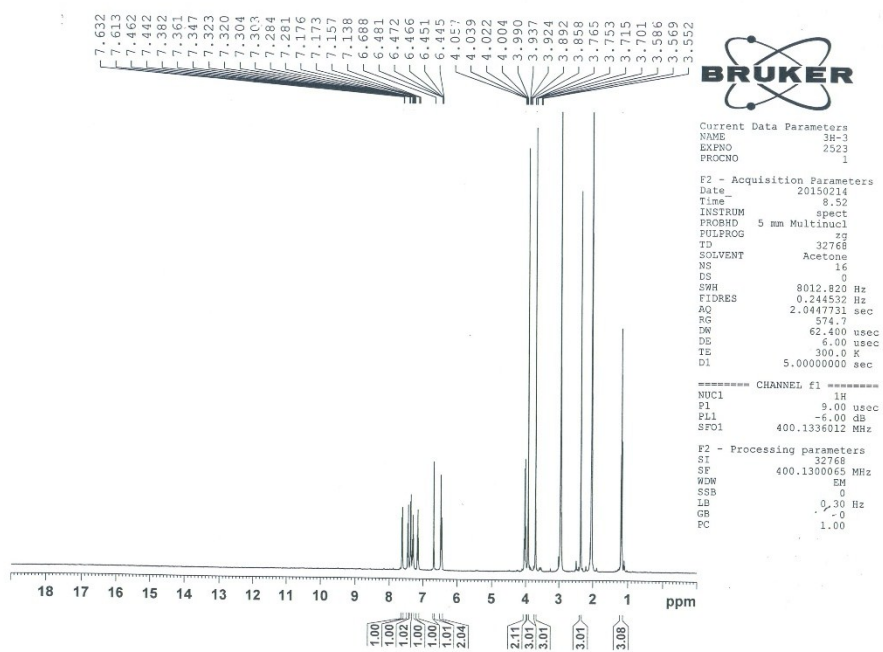

The <sup>1</sup>H NMR (400MHz) spectrum of product (IV<sub>1</sub>)

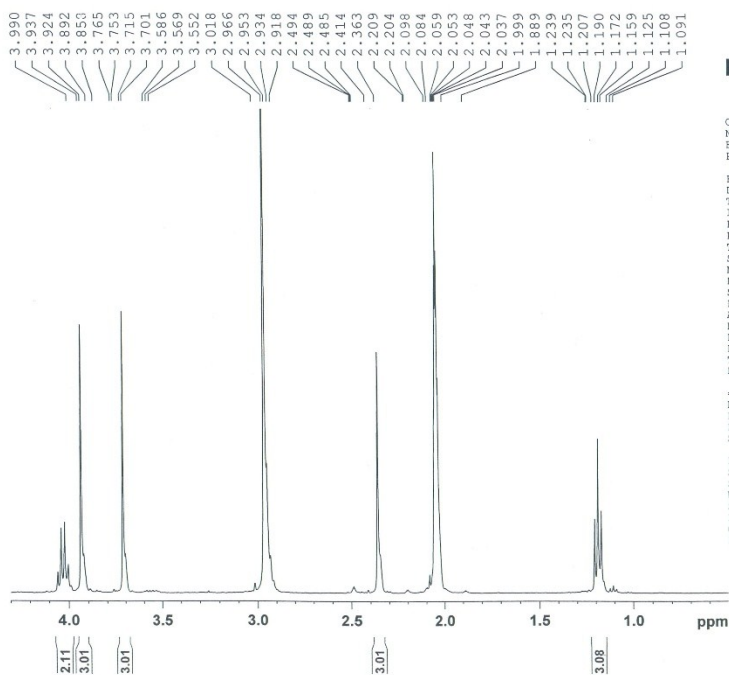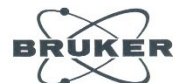

Current Data Parameters  
 NAME 3H-3  
 EXPNO 2523  
 PROCNO 1

F2 - Acquisition Parameters  
 Date 20150214  
 Time 8.52  
 INSTRUM spect  
 PROBHD 5 mm Multinucl  
 PULPROG zg  
 TD 32768  
 SOLVENT Acetone  
 NS 16  
 DS 0  
 SWH 8012.820 Hz  
 FIDRES 0.244532 Hz  
 AQ 2.0447731 sec  
 RG 574.7  
 DW 62.400 usec  
 DE 6.00 usec  
 TE 300.0 K  
 D1 5.0000000 sec

----- CHANNEL f1 -----  
 NUC1 1H  
 P1 9.00 usec  
 PL1 -6.00 dB  
 SFO1 400.1336012 MHz

F2 - Processing parameters  
 SI 32768  
 SF 400.1300065 MHz  
 WDW EM  
 SSB 0  
 LB 0.30 Hz  
 GB 0  
 PC 1.00

The <sup>1</sup>H NMR (400MHz) spectrum of product (IV<sub>1</sub>)

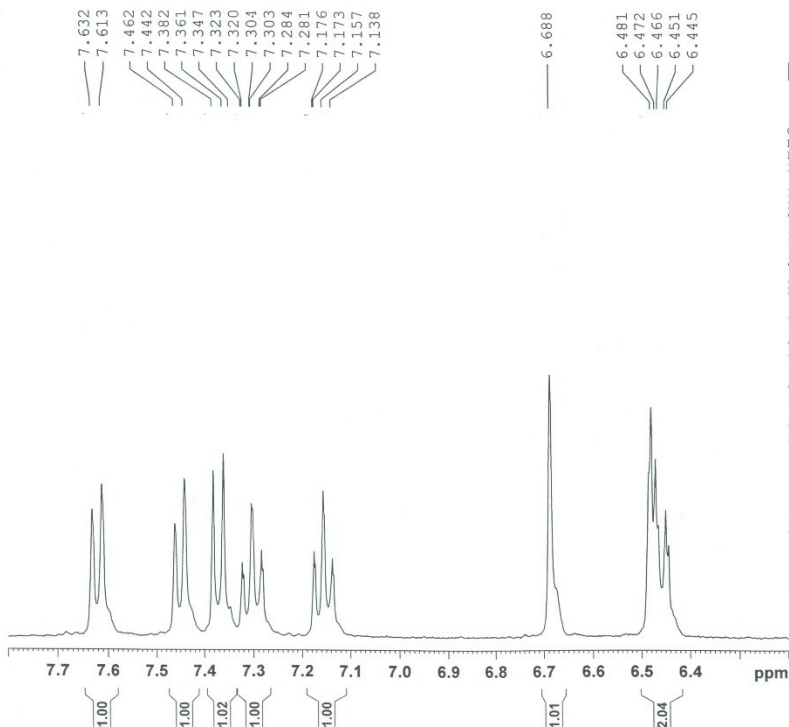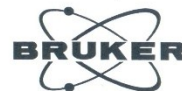

Current Data Parameters  
 NAME 3H-3  
 EXPNO 2523  
 PROCNO 1

F2 - Acquisition Parameters  
 Date 20150214  
 Time 8.52  
 INSTRUM spect  
 PROBHD 5 mm Multinucl  
 PULPROG zg  
 TD 32768  
 SOLVENT Acetone  
 NS 16  
 DS 0  
 SWH 8012.820 Hz  
 FIDRES 0.244532 Hz  
 AQ 2.0447731 sec  
 RG 574.7  
 DW 62.400 usec  
 DE 6.00 usec  
 TE 300.0 K  
 D1 5.0000000 sec

----- CHANNEL f1 -----  
 NUC1 1H  
 P1 9.00 usec  
 PL1 -6.00 dB  
 SFO1 400.1336012 MHz

F2 - Processing parameters  
 SI 32768  
 SF 400.1300065 MHz  
 WDW EM  
 SSB 0  
 LB 0.30 Hz  
 GB 0  
 PC 1.00

The <sup>1</sup>H NMR (400MHz) spectrum of product (IV<sub>1</sub>)

**Ethyl-2-methyl-4-(3,4-dihydroxyphenyl)-4*H*-pyrimido[2,1-*b*][1,3]benzothiazole-3-carboxylate (table 4, IV<sub>m</sub>).**

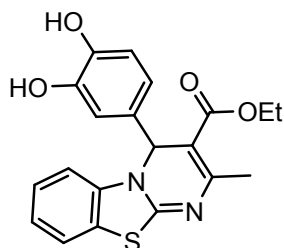

Gray solid. <sup>1</sup>H NMR (Acetone-d<sub>6</sub>, 400 MHz): δ 8.30 (s, 1H), 7.91 (s, 1H), 7.64 (d, *J*=7.6 Hz, 1H), 7.37 (d, *J*=8 Hz, 1H), 7.32 (t, *J*=7.6 Hz, 1H), 7.19 (t, *J*=7.6 Hz, 1H), 6.94 (s, 1H), 6.87 (d, *J*=8 Hz, 1H), 6.71 (d, *J*=8 Hz, 1H), 6.37 (s, 1H), 4.12 (q, *J*=7.2 Hz, 2H), 2.33 (s, 3H), 1.20 (t, *J*=7.2 Hz, 3H). IR (KBr): 3380, 2981, 1661, 1595, 1507, 1446, 1274, 1252, 1211, 1100, 753 cm<sup>-1</sup>. mp: 225-227 °C.

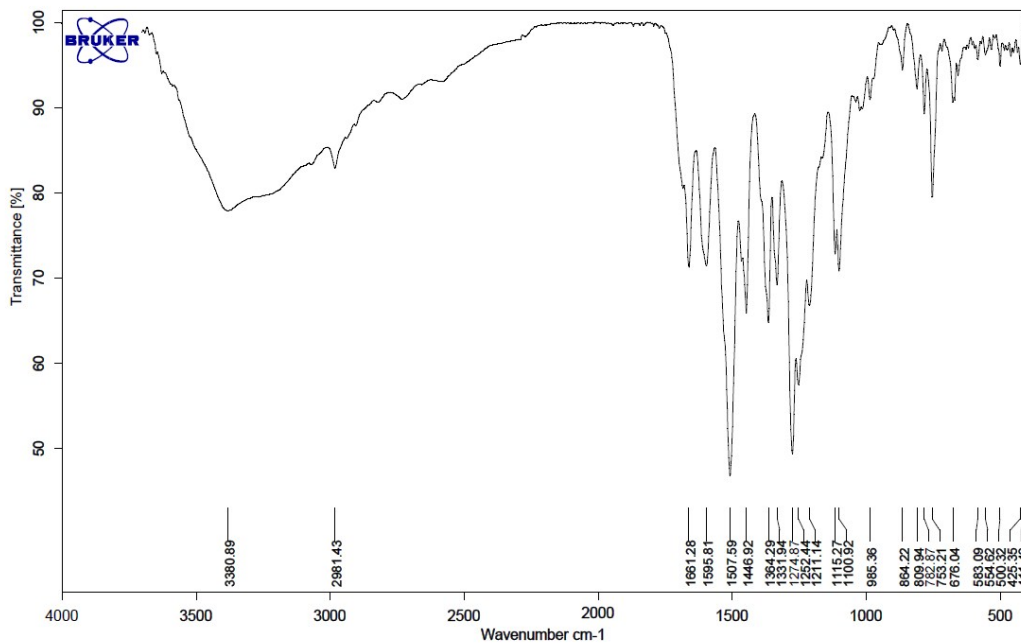

The FT-IR spectrum of product (IV<sub>m</sub>)



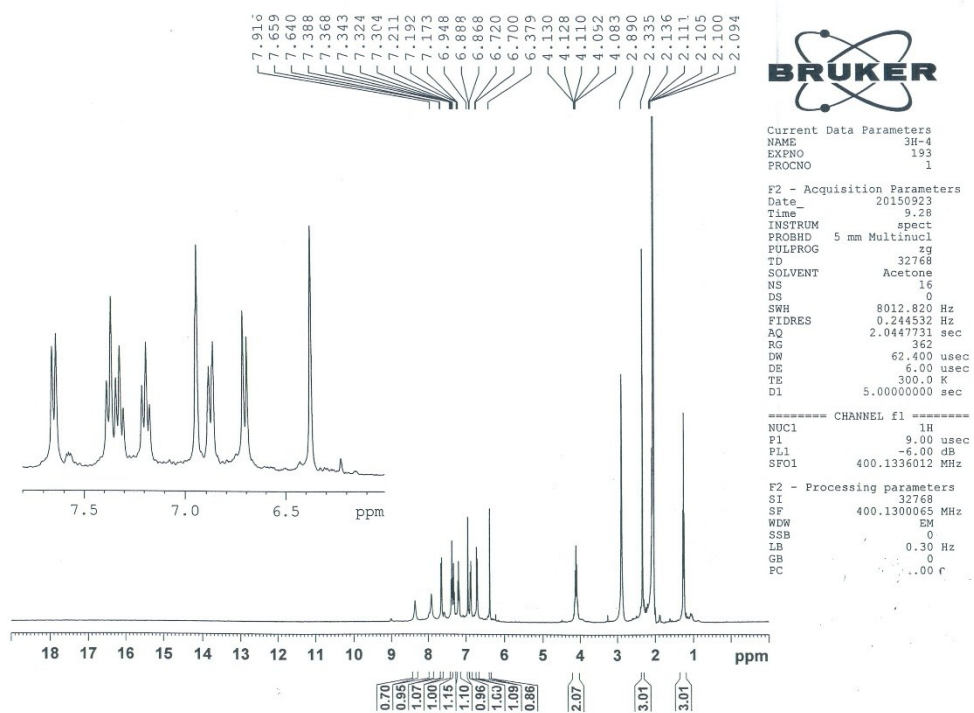

The <sup>1</sup>H NMR (400MHz) spectrum of product (IV<sub>m</sub>)
